# Supplementary material for: The Transcription Factor Sfp1 Regulates the Oxidative Stress Response in Candida albicans
Source: MDPI journal article supplement (doi:10.3390/microorganisms7050131), 2019-05-14
Supplement: s1 [file s1]

**Table S1.** The *C. albicans* strains used in this study.

| Strain name         | Genotype                                         | Source <sup>#</sup> |
|---------------------|--------------------------------------------------|---------------------|
| SC5314              | Wild type                                        | [1]                 |
| <i>SFP1</i> mutants |                                                  |                     |
| <i>sfp1</i> Δ/Δ     | <i>sfp1</i> Δ::FRT/ <i>sfp1</i> Δ::FRT           | [2]                 |
| <i>SFP1</i> RD      | <i>sfp1</i> Δ::SFP1-FRT/ <i>sfp1</i> Δ::SFP1-FRT | [2]                 |

1. Gillum, A.M.; Tsay, E.Y.; Kirsch, D.R. Isolation of the *Candida albicans* gene for orotidine-5'-phosphate decarboxylase by complementation of *S. cerevisiae* *ura3* and *E. coli* *pyrF* mutations. *Mol. Gen. Genet.* **1984**, *198*, 179-182.
2. Chen, H.-F.; Lan, C.-Y. Role of *SFP1* in the regulation of *Candida albicans* biofilm formation. *PLoS One* **2015**, *10*, doi:10.1371/journal.pone.0129903.

**Table. S2.** Oligonucleotides used in this study.

| Name    | Sequence (5' to 3')            |
|---------|--------------------------------|
| SOD1-F  | TGTTGTCAGAGGTGATTCAAAAGTC      |
| SOD1-R  | GTTGGAGCGGATTCGGATT            |
| SOD4-F  | TTTGAGCCAGCAAACAATGG           |
| SOD4-R  | CACCTGAAGGCAATCCAGTTAAA        |
| SOD5-F  | AAGGATTGCCCTCTGATATTGG         |
| SOD5-R  | GATGCTGGCACTGGTTTTTCA          |
| CAT1-F  | ATTTCATCCACACCCAAAGAGA         |
| CAT1-R  | CAAGTAATCCCAAACATGTTAGCA       |
| GPX2-F  | TTGGTGTGACTTTCCCCGTATT         |
| GPX2-R  | CCGGGCTTTTGAGACTTCAA           |
| GCS1-F  | CCACAAGCATTAAACAATTCAACTACA    |
| GCS1-R  | ACCCAATGTGCCGTGGTT             |
| GTT11-F | AATATTTTCCAAAACAAACGTGGGG CTGA |
| GTT11-R | CCAATTCTTGAGCCTTGATGTATTGGGTTC |
| SSK1-F  | TAAATGGAAAAAGGGAGGGTTTC        |
| SSK1-R  | AATCCCTGATTTCACTGGCAAT         |
| SHO1-F  | ACTGGTGCCATCATTAAACCCTAA       |
| SHO1-R  | TGATGAGCTGATCCACCAATAGA        |
| CAP1-F  | ACCGTGAACGTAAAGAACG            |
| CAP1-R  | GCTACCACCAGTATATTAGCC          |

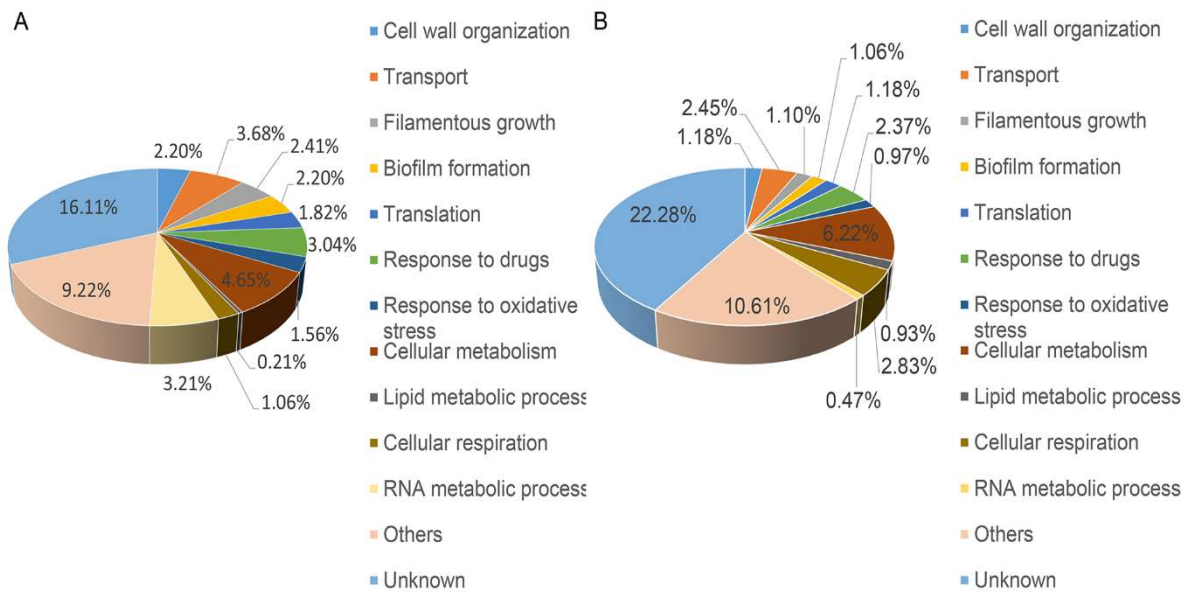

**Figure S1.** Gene ontology (GO) distribution of *C. albicans* genes regulated by *SFP1*. The 1145 and 1220 genes upregulated (A) or downregulated (B) in the *sfp1Δ/sfp1Δ* mutant were classified by biological processes, separately. Because several GO terms could be assigned to one single gene, the most represented GO terms were calculated over 100 %.

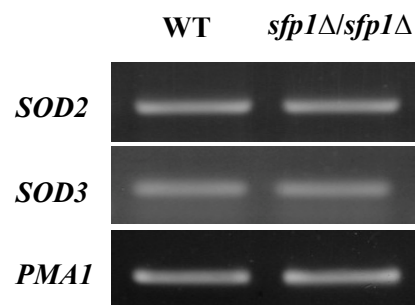

**Figure S2.** The *SOD2* and *SOD3* gene expression in the *sfp1Δ/sfp1Δ* mutant. The expression levels of *SOD2* and *SOD3* were detected by RT-PCR. The *PMA1* transcript was used as a loading control. WT: the wild-type strain.

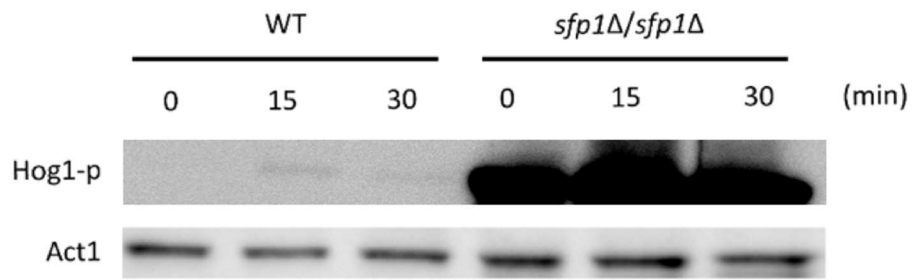

**Figure S3.** Hog1 phosphorylation by Western blot with a longer exposure. After cell treatment with 10 mM H<sub>2</sub>O<sub>2</sub> for 0, 15, 30 min, Hog1 phosphorylation was assayed by Western blotting. Act1 was used as a loading control. Anti-phospho-p38 (Thr180/Tyr182) antibody (Cell Signaling, Inc.) was used to detect phosphorylated Hog1. Rabbit polyclone anti-β-actin antibody (GeneTex, Inc.) was used to detect Act1. The blot was exposure for a longer time compared to that shown in Figure 7B.
